# Supplementary material for: Deriving genetic codes for molecular phenotypes from first principles
Source: bioRxiv or medRxiv preprint supplement (doi:10.1101/2022.08.15.503769), 2026-01-10

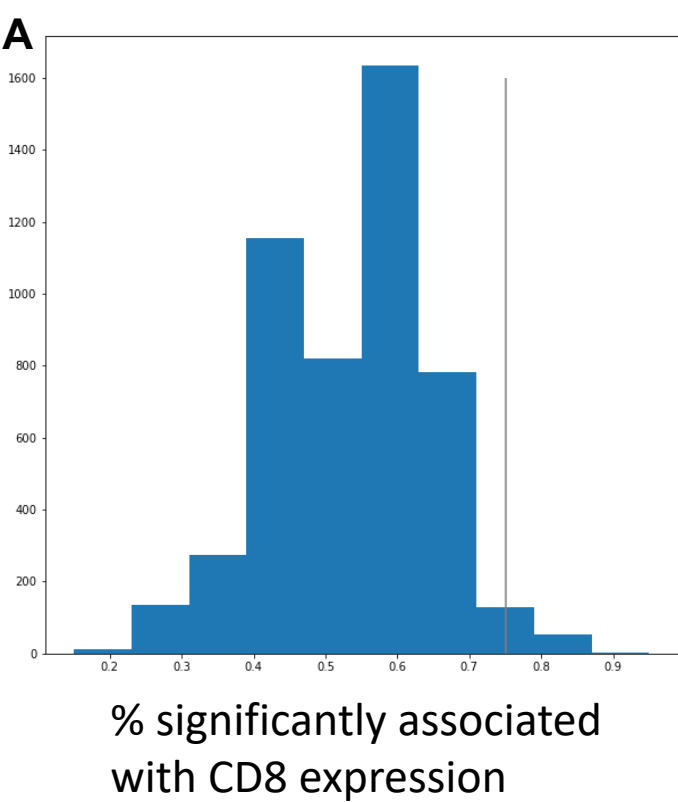

**B**

| gene           | q-value  | t-score   |
|----------------|----------|-----------|
| <b>CRYGD</b>   | 0.113842 | -4.169784 |
| <b>FAM25G</b>  | 0.172083 | -4.032819 |
| <b>EXOC8</b>   | 0.191435 | -3.812536 |
| <b>RNASEL</b>  | 0.191435 | -3.757805 |
| <b>ZIC5</b>    | 0.207291 | -3.700141 |
| <b>FAM25C</b>  | 0.301148 | -3.529715 |
| <b>TTC30A</b>  | 0.323806 | -3.424925 |
| <b>SLC30A1</b> | 0.389727 | -3.275132 |
| <b>FSHB</b>    | 0.391665 | -3.229056 |
| <b>ARGFX</b>   | 0.403869 | -3.180419 |

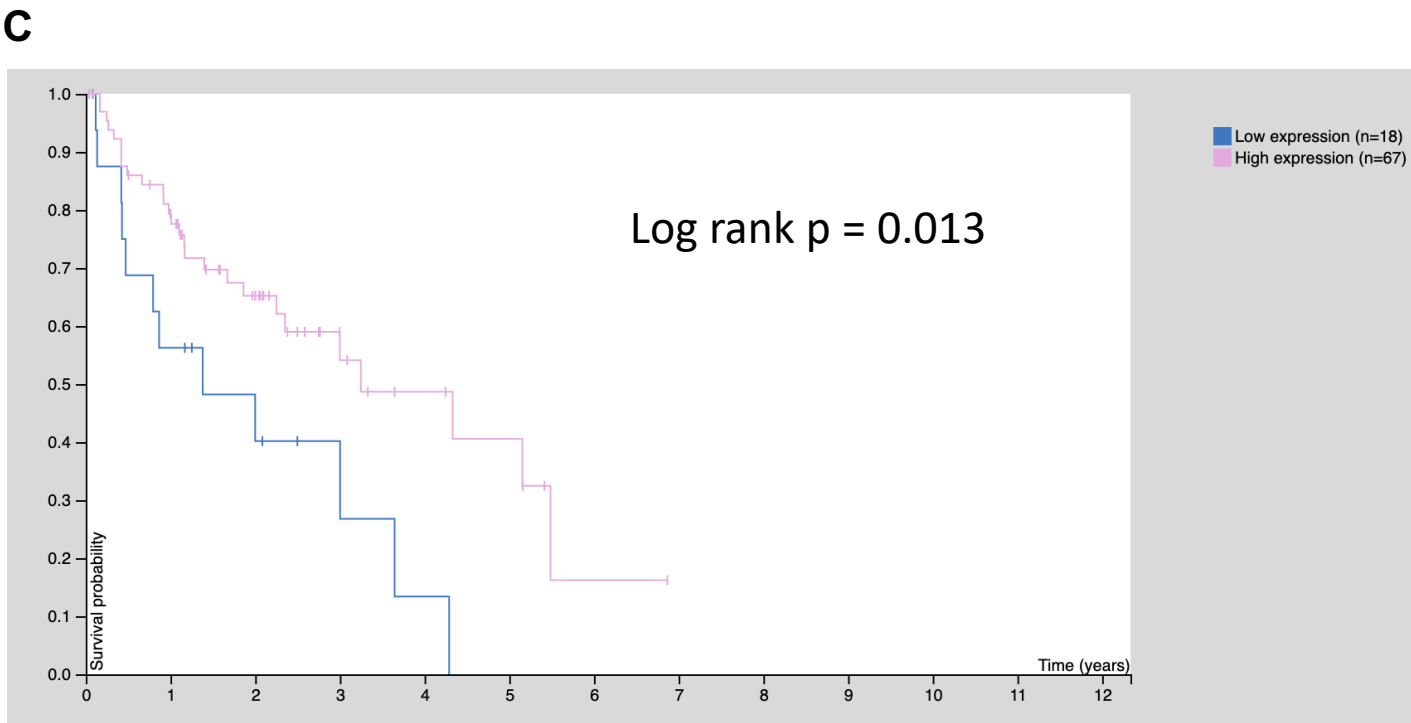

Supplement: Supplementary file [file media-4.pdf]
