# Supplementary material for: Deriving genetic codes for molecular phenotypes from first principles
Source: bioRxiv or medRxiv preprint supplement (doi:10.1101/2022.08.15.503769), 2026-01-10
Supplement: Supplementary file [file media-5.pdf]

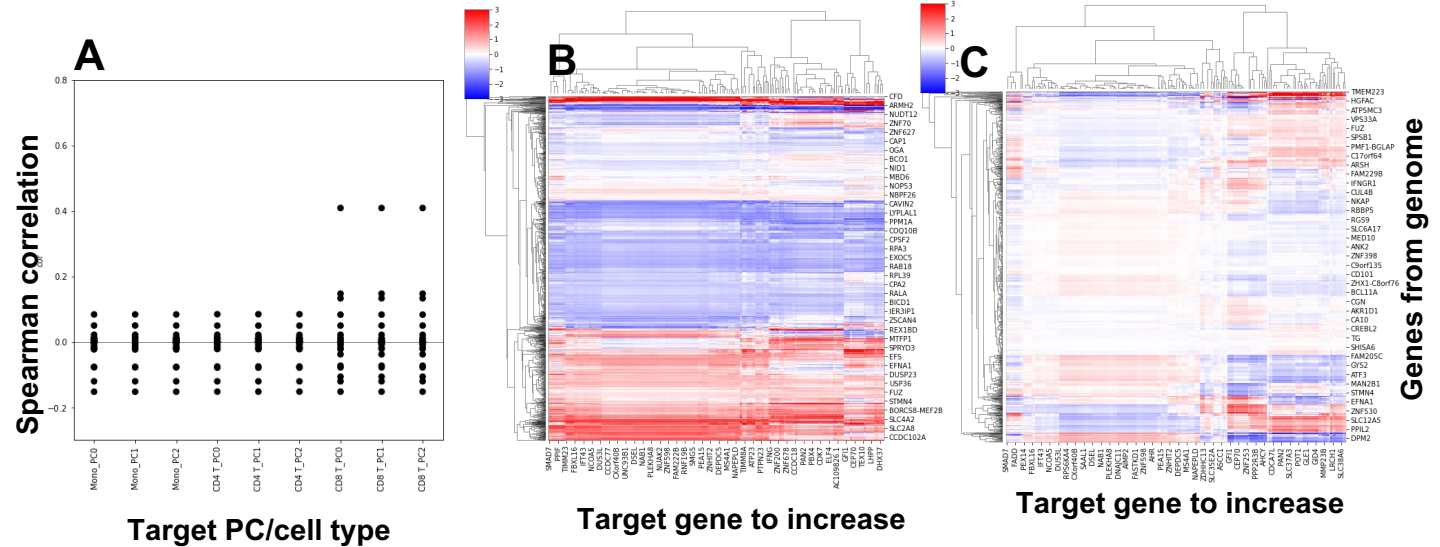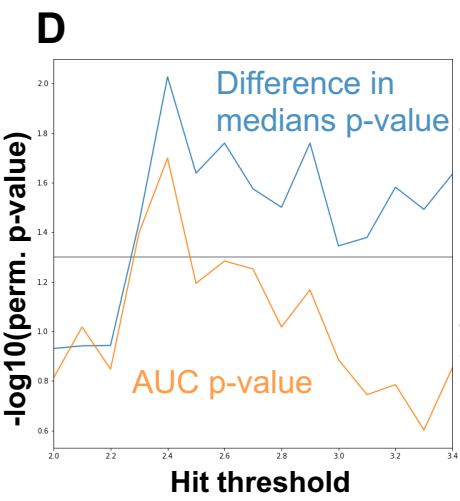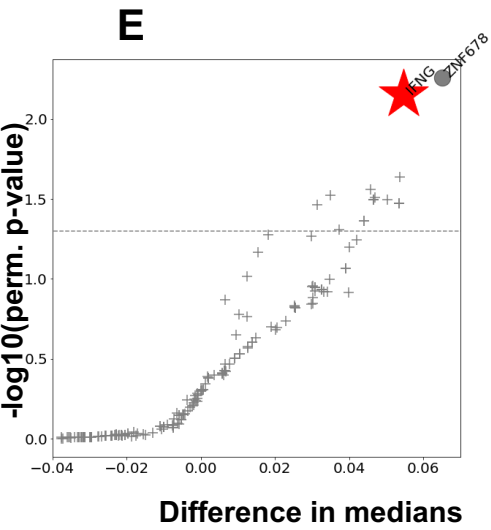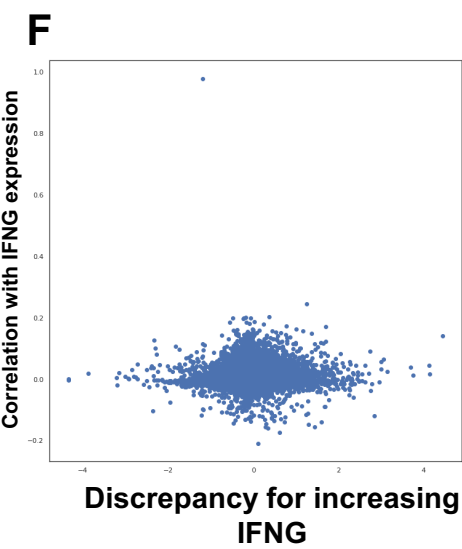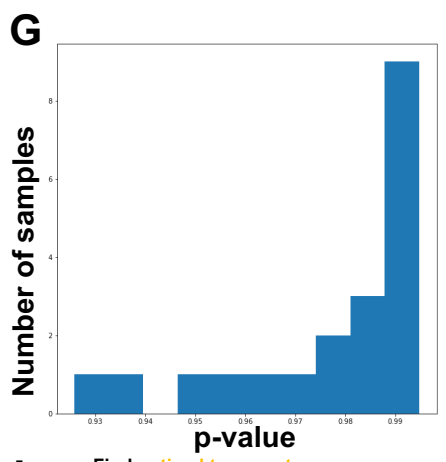

**H**

| Gene   | Discrepancy |
|--------|-------------|
| TSSK2  | 6.31        |
| CFL1   | 4.78        |
| SDF211 | 4.29        |
| CAMP   | 4.13        |
| ZNHIT2 | 3.88        |

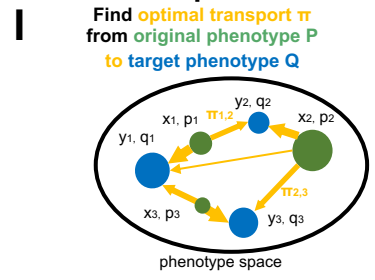

$$d_T(P, Q)(s) = \sum_{i,j} \pi_{i,j} |T(x_i)(s) - T(y_j)(s)|^2$$
